# Supplementary material for: Un retour tant attendu! : il y a 150 ans… La Capricieuse entrait dans le port de Québec
Source: MDPI journal article supplement (doi:10.3390/ani11113149), 2005-01-01
Supplement: s1 [file s1]

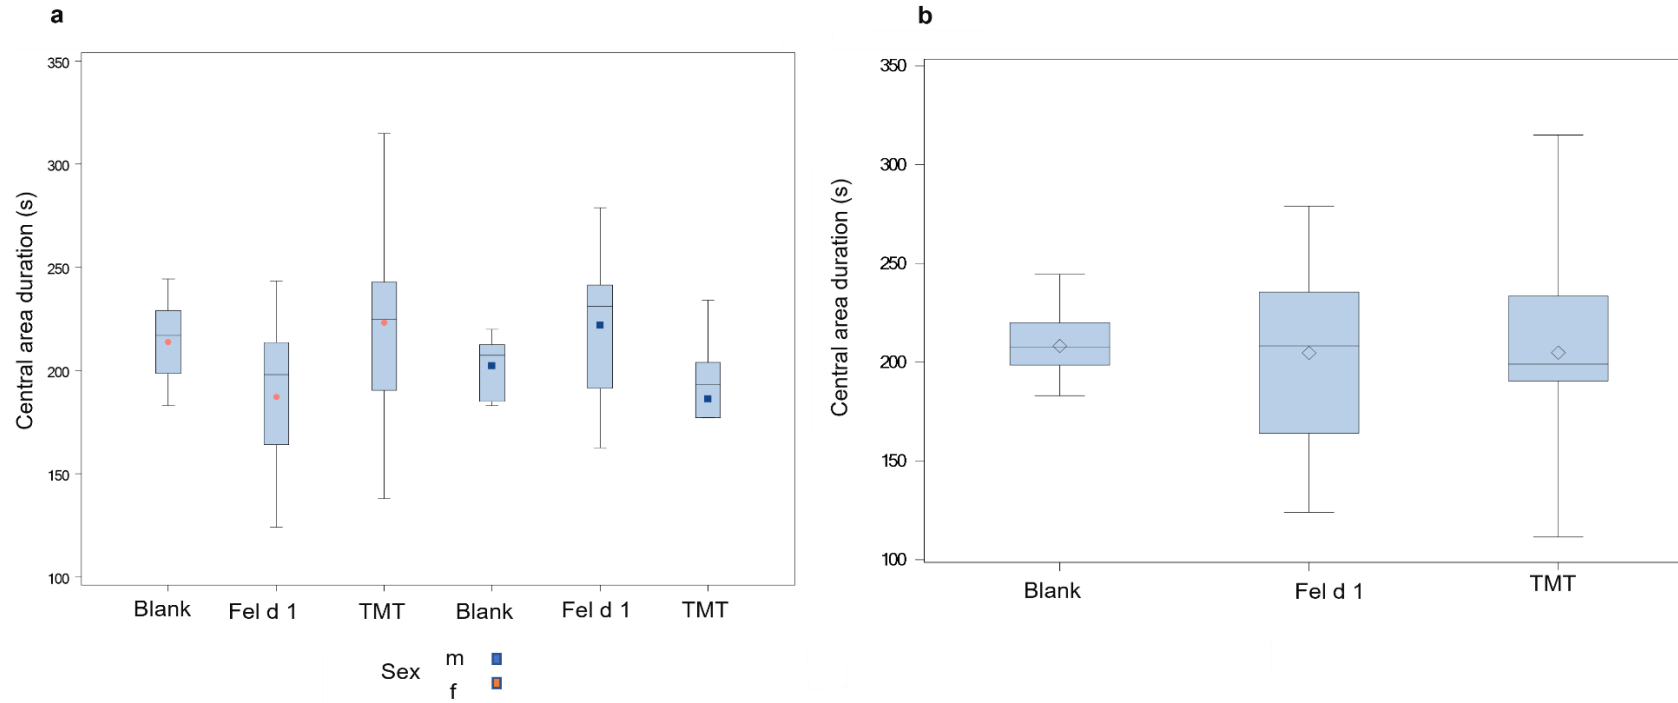

**Figure S1.** Duration in the central area per sex and treatment (a) and per treatment (b). Sheirer-Ray-Hare test. Significant threshold was fixed at 0.05.

**Table S1.** Statistics for central area

| Variable               | Mean-squared | $\chi^2$ | $p$   |
|------------------------|--------------|----------|-------|
| Treatment              | 5,786        | 0.038    | 0.980 |
| Sex                    | 46.095       | 0.306    | 0.579 |
| Treatment $\times$ Sex | 477.310      | 3.171    | 0.204 |

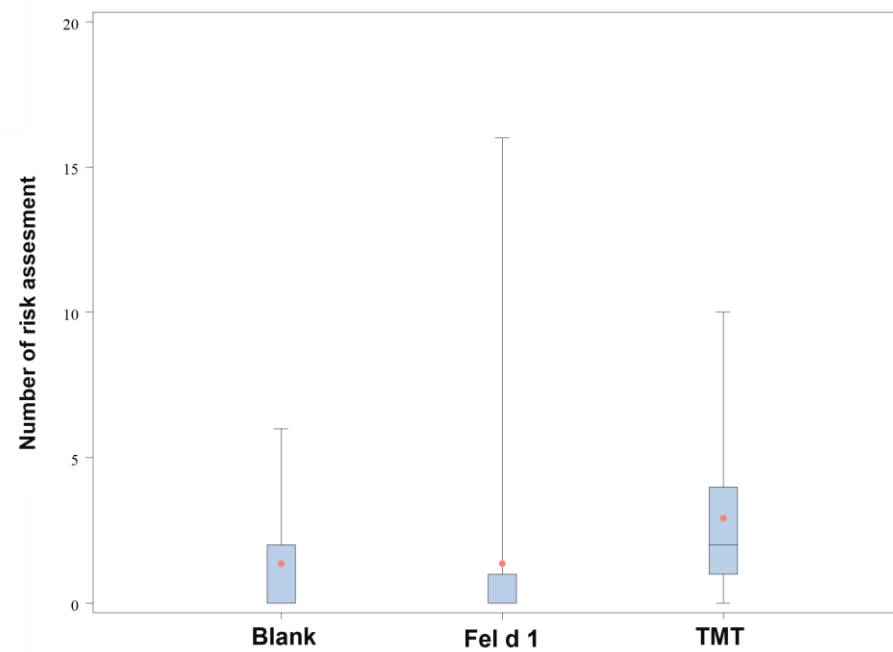

**Figure S2.** Number of risk assessment behaviours during the tests. Sheirer-Ray-Hare test. Significant threshold was fixed at 0,5.

**Table S2.** Statistics for risk assessment behaviour

| Variable        | Mean-squared | $\chi^2$ | <i>p</i> |
|-----------------|--------------|----------|----------|
| Treatment       | 546.232      | 3.629    | 0.162    |
| Sex             | 17.357       | 0.115    | 0.734    |
| Treatment × Sex | 149.589      | 0.993    | 0.608    |
